# Supplementary material
Source: Royal Society of Chemistry journal article supplement (doi:10.1039/d5fd00112a)
Supplement: d5fd00112a1.pdf [file d5fd00112a1.pdf]

## Supplementary information

### Critical Assessment of Theoretical Modelling of Single-Atom Catalysts

Halil Bilgin, Alessandro Bonardi, Matteo Spotti, Giovanni Di Liberto, Gianfranco Pacchioni\*

*Department of Materials Science, University of Milano-Bicocca, Via Cozzi 55, 20125 Milano, Italy*

#### Adsorption properties of 4N-Gr support and TM@4N-Gr

##### 4N-Gr support (no TM present)

Table S1: Adsorption energy and Gibbs free energy of H\* on all possible adsorption sites of 4N-Gr.

| Adsorption site of H* | $\Delta E_{ads}$ /eV | $\Delta G_{ads}$ /eV | $\eta$ /V |
|-----------------------|----------------------|----------------------|-----------|
| N                     | -1.87                | -1.63                | 1.63      |
| C5                    | 1.31                 | 1.55                 | 1.55      |
| C6                    | 1.07                 | 1.31                 | 1.31      |
| C7                    | 1.11                 | 1.35                 | 1.35      |
| C8                    | 1.17                 | 1.41                 | 1.41      |
| C10                   | 1.24                 | 1.48                 | 1.48      |
| C16                   | 0.97                 | 1.21                 | 1.21      |
| C18                   | 0.70                 | 0.94                 | 0.94      |
| C19                   | 1.29                 | 1.53                 | 1.53      |

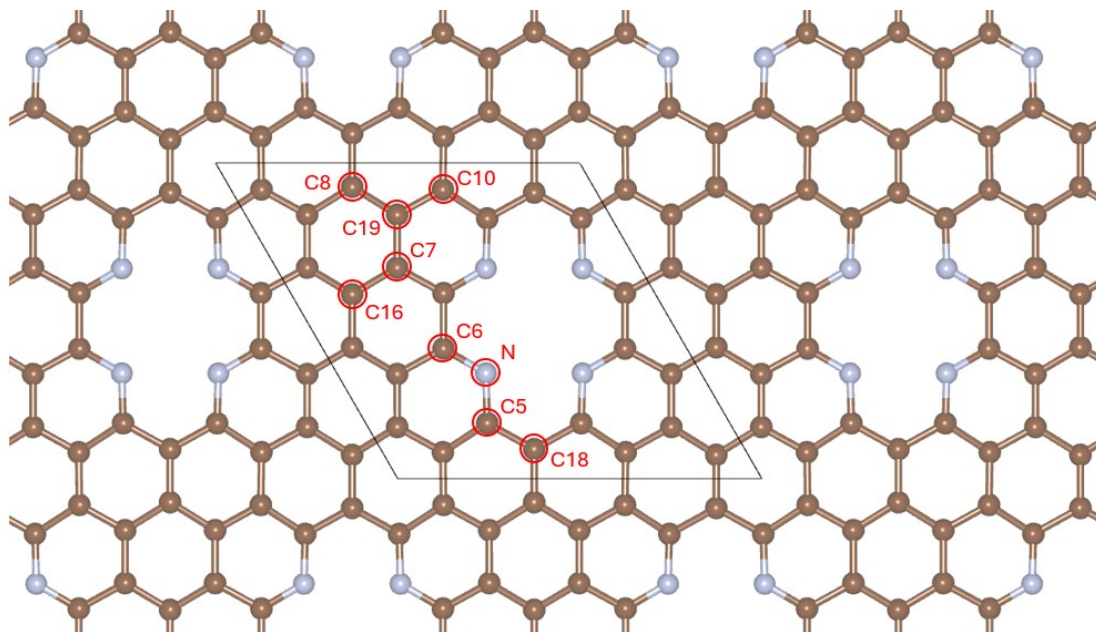

Figure S1: Possible adsorption sites of H\* on 4N-Gr.

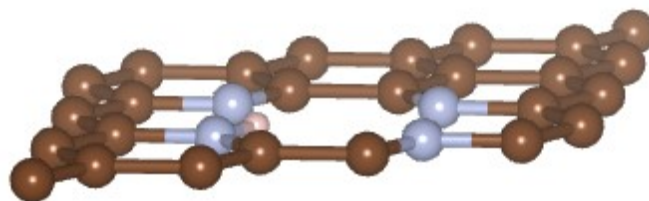

Figure S2: Adsorption configuration of H\* on N-site of 4N-Gr.

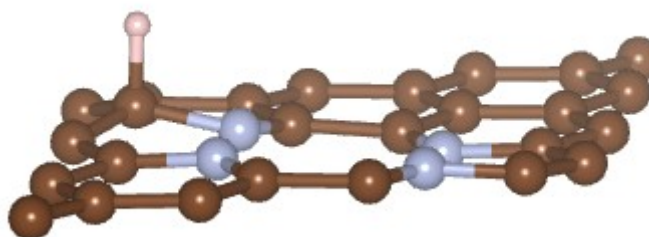

Figure S3: Adsorption configuration of H\* on C5-site of 4N-Gr.

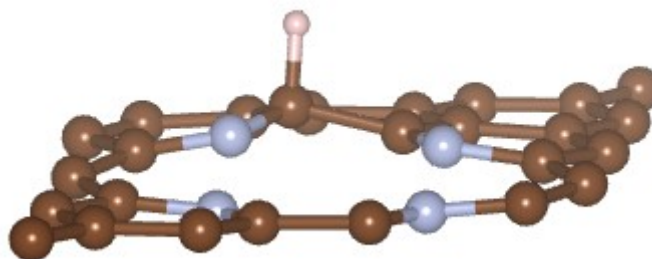

Figure S4: Adsorption configuration of H\* on C6-site of 4N-Gr.

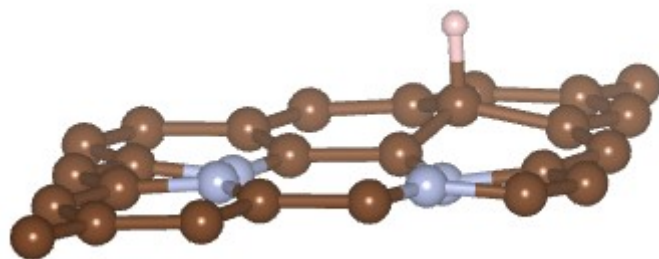

Figure S5: Adsorption configuration of H\* on C7-site of 4N-Gr.

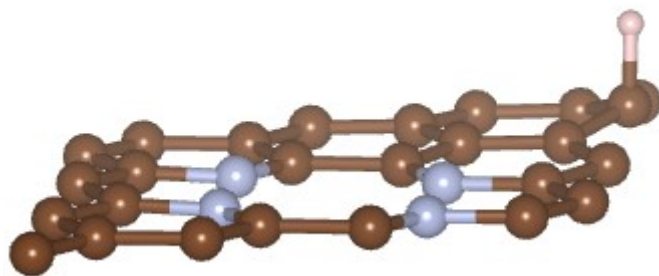

Figure S6: Adsorption configuration of H\* on C8-site of 4N-Gr.

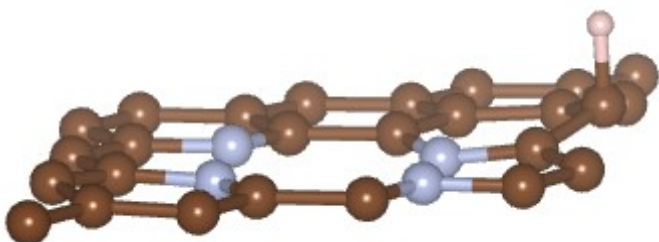

Figure S7: Adsorption configuration of H\* on C10-site of 4N-Gr.

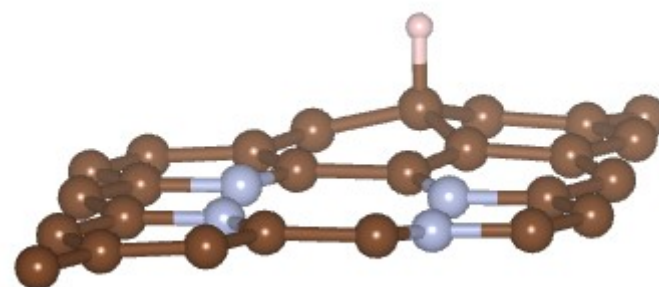

Figure S8: Adsorption configuration of H\* on C16-site of 4N-Gr.

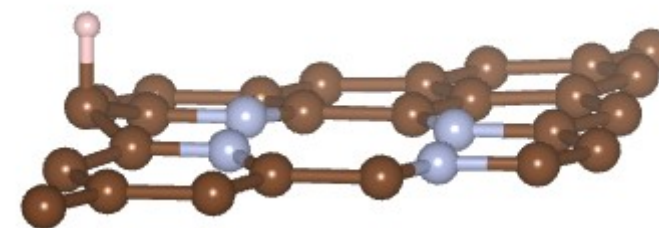

Figure S9: Adsorption configuration of H\* on C18-site of 4N-Gr.

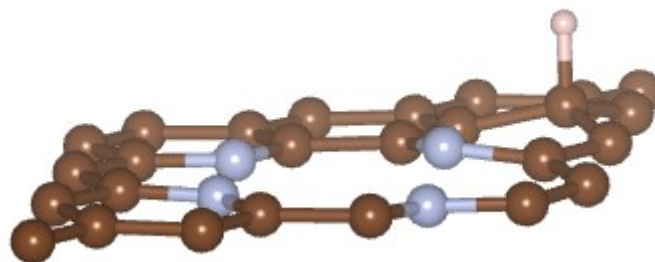

Figure S10: Adsorption configuration of H\* on C19-site of 4N-Gr.

## Ti@4N-Gr

Table S2: Binding energy and protrusion of Ti atom embedded in 4N-Gr matrix.

| System   | $\Delta E_{binding}$ /eV | Protusion /Å |
|----------|--------------------------|--------------|
| Ti@4N-Gr | -8.28                    | 0.00         |

Table S3: Adsorption energy and Gibbs free energy of H\* on metal and near-metal adsorption sites of Ti@4N-Gr.

| Adsorption site of H* | $\Delta E_{ads}$ /eV | $\Delta G_{ads}$ /eV | $\eta$ /V |
|-----------------------|----------------------|----------------------|-----------|
| Ti                    | -1.09                | -0.85                | 0.85      |
| N                     | 0.58                 | 0.82                 | 0.82      |
| C                     | 0.14                 | 0.38                 | 0.38      |
| C1                    | 0.12                 | 0.36                 | 0.36      |
| C2                    | 0.65                 | 0.89                 | 0.89      |

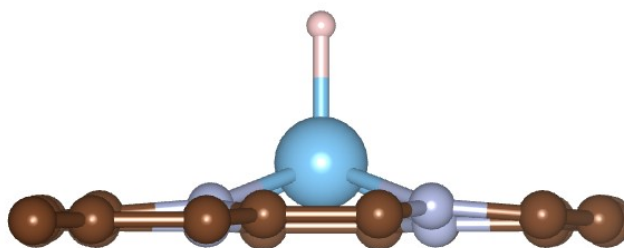

Figure S11: Adsorption configuration of H\* on Ti-site of Ti@4N-Gr.

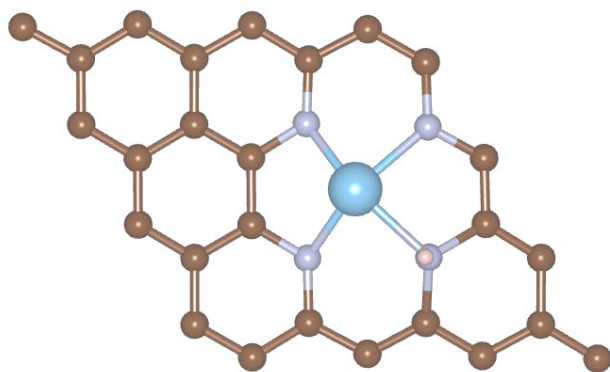

Figure S12: Adsorption configuration of H\* on N-site of Ti@4N-Gr.

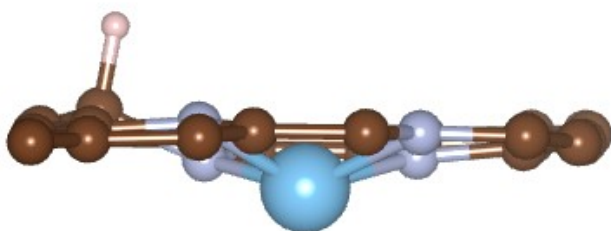

Figure S13: Adsorption configuration of H\* on C-site of Ti@4N-Gr.

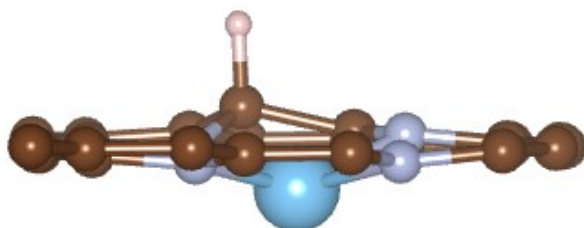

Figure S14: Adsorption configuration of H\* on C1-site of Ti@4N-Gr.

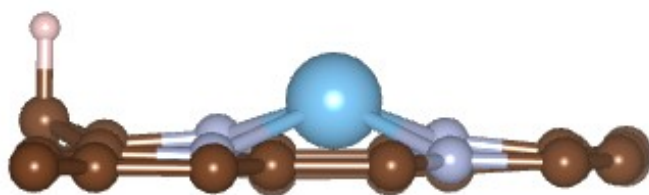

Figure S15: Adsorption configuration of H\* on C2-site of Ti@4N-Gr.

## Rh@4N-Gr

Table S4: Binding energy and protrusion of Ce atom embedded in 4N-Gr matrix.

| System   | $\Delta E_{binding}$ /eV | Protrusion /Å |
|----------|--------------------------|---------------|
| Rh@4N-Gr | -7.86                    | 0.00          |

Table S5: Adsorption energy and Gibbs free energy of H\* on metal and near-metal adsorption sites of Rh@4N-Gr.

| Adsorption site of H* | $\Delta E_{ads}$ /eV | $\Delta G_{ads}$ /eV | $\eta$ /V |
|-----------------------|----------------------|----------------------|-----------|
| Rh                    | -0.53                | -0.29                | 0.29      |
| N                     | \                    | \                    | \         |
| C                     | 1.07                 | 1.31                 | 1.31      |
| C1                    | 0.58                 | 0.82                 | 0.82      |
| C2                    | 0.50                 | 0.74                 | 0.74      |

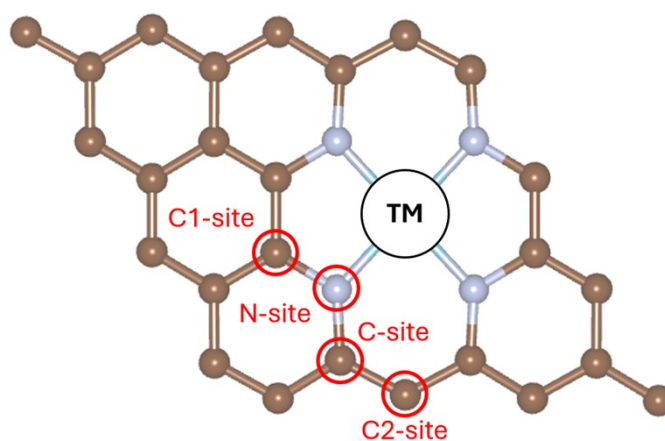

Figure S16: Possible adsorption near-metal sites of H\* on TM@4N-Gr.

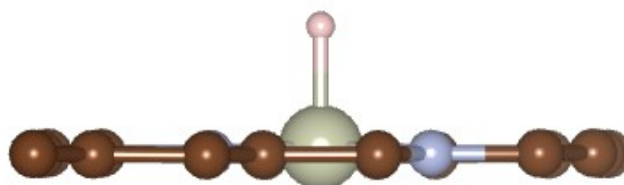

Figure S17: Adsorption configuration of H\* on Rh@4N-Gr.

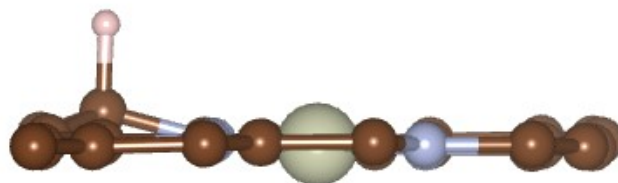

Figure S18: Adsorption configuration of H\* on C-site Rh@4N-Gr.

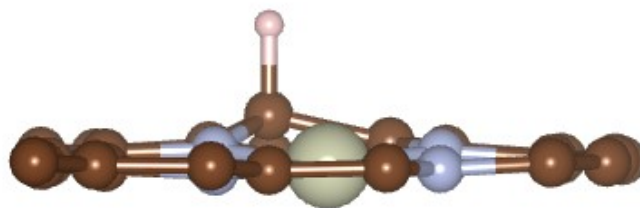

Figure S19: Adsorption configuration of H\* on C1-site Rh@4N-Gr.

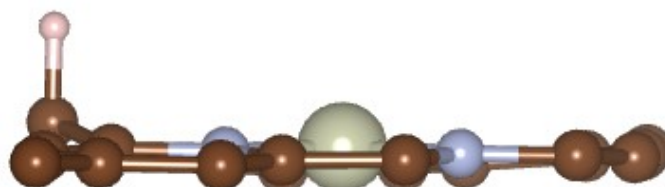

Figure S20: Adsorption configuration of H\* on C2-site Rh@4N-Gr.

## Ce@4N-Gr

Table S6: Binding energy and protrusion of Ce atom embedded in 4N-Gr matrix.

| System   | $\Delta E_{binding}$ /eV | Protrusion /Å |
|----------|--------------------------|---------------|
| Ce@4N-Gr | -8.58                    | 1.24          |

Table S7: Adsorption energy and Gibbs free energy of H\* on Ce-site of Ce@4N-Gr.

| Intermediate | $\Delta E_{ads}$ /eV | $\Delta G_{ads}$ /eV | $\eta$ /V | d(Ce-H) /Å |
|--------------|----------------------|----------------------|-----------|------------|
| H*           | 0.03                 | 0.27                 | 0.27      | 2.12       |

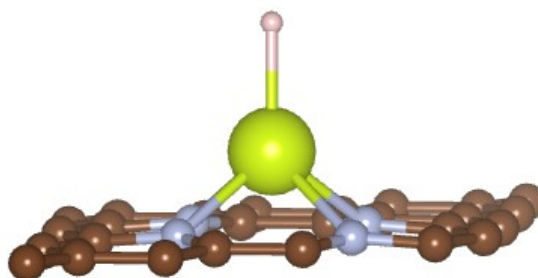

Figure S21: Adsorption configuration of H\* on Ce@4N-Gr.
